# Supplementary material for: Comparison of Proximal Remote Sensing Devices of Vegetable Crops to Determine the Role of Grafting in Plant Resistance to Meloidogyne incognita
Source: MDPI journal article supplement (doi:10.3390/agronomy12051098), 2022-04-30
Supplement: s1 [file s1]

**Table S1.** Mean and standard error of two treatments (grafted, non-grafted) of three classes of parameters (leaf level pigments, canopy vigor and biomass, water stress and root health) combination of the values of the four crops (melon, tomato, eggplant, pepper) n=152 for 5 years (2016-2020).

|                                                     | Parameters        | Mean grafted   | Mean non- grafted |
|-----------------------------------------------------|-------------------|----------------|-------------------|
| <b>Leaf level pigments (SPAD, Dualex)</b>           | SPAD              | 45.77±0.87     | 43.82±0.86        |
|                                                     | Chl               | 26.03±0.50     | 27.07±0.53        |
|                                                     | Flav              | 0.91±0.04      | 1.00±0.02         |
|                                                     | Anth              | 0.06±0.01      | 0.07±0.02         |
|                                                     | NBI               | 33.66±0.64     | 32.02±0.61        |
| <b>Canopy vigor, biomass (GA and GGA up to RGB)</b> | NDVI              | 0.46±0.03      | 0.46±0.02         |
|                                                     | GA                | 0.39±0.02      | 0.38±0.03         |
|                                                     | GGA               | 0.29±0.03      | 0.34±0.02         |
|                                                     | NGRDI             | 0.06±0.26      | 0.33±0.27         |
|                                                     | TGI               | 4145.16±444.77 | 3516.36±449.86    |
|                                                     | CSI               | 34.15±1.92     | 25.07±1.90        |
| <b>Water stress and root health</b>                 | Porometer         | 114.24±5.35    | 111.57±5.34       |
|                                                     | Temperature       | 25.62±0.20     | 25.24±0.22        |
|                                                     | δ <sup>13</sup> C | -26.26±0.85    | -25.99±0.82       |
|                                                     | Percent C         | 30.35±1.01     | 30.89±0.98        |
|                                                     | δ <sup>15</sup> N | 5.61±0.23      | 5.30±0.22         |
|                                                     | Percent N         | 2.36±0.10      | 2.33±0.09         |

SPAD (Soil Plant Analysis Development), Chl (chlorophyll), Flav (flavonoid), Anth ( anthocyanin), NBI (Nitrogen Balance Index), GA (Green area), GGA (Greener Green Area), TGI (Triangular Greenness Index), NGRDI (Normalized Green Red Difference Index), CSI (Crop Senescence Index), δ<sup>13</sup>C (isotopic composition of carbon 13), percent C (percentage of carbon), δ<sup>15</sup>N (isotopic composition of nitrogen 15), percent N (percentage of nitrogen).

**Table S2.** ANOVA of melon crops of two years combined (2016, 2017) n=20+16, including value of separate years of three classes of parameters (leaf level pigments, canopy vigor and biomass, water stress and root health).

|                                                             | <b>Parameters</b>     | <b>P Value<br/>Treatments<br/>Combined</b> | <b>P Value<br/>Treatments<br/>2016</b> | <b>P Value<br/>Treatments<br/>2017</b> |
|-------------------------------------------------------------|-----------------------|--------------------------------------------|----------------------------------------|----------------------------------------|
| <b>Leaf level pigments<br/>(SPAD,<br/>Duallex)</b>          | SPAD                  | 0.999                                      | 0.190                                  | 0.022                                  |
|                                                             | Chl                   | 0.096                                      | 0.736                                  | 0.060                                  |
|                                                             | Flav                  | 0.153                                      | 0.240                                  | 0.020                                  |
|                                                             | Anth                  | 0.153                                      | 0.266                                  | 0.380                                  |
|                                                             | NBI                   | 0.186                                      | 0.869                                  | 0.131                                  |
| <b>Canopy vigor, biomass<br/>(GA and GGA up to<br/>RGB)</b> | NDVI                  | 0.484                                      | 0.158                                  | 0.983                                  |
|                                                             | GA                    | 0.689                                      | 0.265                                  | 0.777                                  |
|                                                             | GGA                   | 0.575                                      | 0.392                                  | 0.965                                  |
|                                                             | NGRDI                 | 0.512                                      | 0.187                                  | 0.522                                  |
|                                                             | TGI                   | 0.325                                      | 0.000                                  | 0.001                                  |
|                                                             | CSI                   | 0.279                                      | 0.010                                  | 0.523                                  |
| <b>Water stress and root<br/>health</b>                     | Porometer             | 0.471                                      | 0.325                                  | 0.721                                  |
|                                                             | Temperature           | 0.513                                      | 0.123                                  | 0.888                                  |
|                                                             | $\delta^{13}\text{C}$ | 0.848                                      | 0.305                                  | 0.297                                  |
|                                                             | Percent C             | 0.665                                      | 0.985                                  | 0.508                                  |
|                                                             | $\delta^{15}\text{N}$ | 0.827                                      | 0.990                                  | 0.402                                  |
|                                                             | Percent N             | 0.292                                      | 0.186                                  | 0.857                                  |

SPAD (Soil Plant Analysis Development), Chl (chlorophyll), Flav (flavonoid), Anth ( anthocyanin), NBI (Nitrogen Balance Index), GA (Green area), GGA (Greener Green Area), TGI (Triangular Greenness Index), NGRDI (Normalized Green Red Difference Index), CSI (Crop Senescence Index),  $\delta^{13}\text{C}$  (isotopic composition of carbon 13), percent C (percentage of carbon),  $\delta^{15}\text{N}$  (isotopic composition of nitrogen 15), percent N (percentage of nitrogen).

**Table S3.** Mean and standard error of two treatments (grafted, non-grafted) of combined two years (2016, 2017) n=20+16 of melon crops grown in a greenhouse in soil infected by root knot nematode of three classes of parameters (leaf level pigments, canopy vigor and biomass, water stress and root health).

|                                                    | Parameters        | Mean grafted    | Mean non-grafted |
|----------------------------------------------------|-------------------|-----------------|------------------|
| <b>Leaf level pigments (SPAD, Dualex)</b>          | SPAD              | 39.42±1.56      | 39.42±1.54       |
|                                                    | Chl               | 31.24±1.62      | 35.15±1.64       |
|                                                    | Flav              | 0.17±0.03       | 0.18±0.01        |
|                                                    | Anth              | 0.17±0.01       | 0.18±0.02        |
|                                                    | NBI               | 19.65±0.94      | 17.93±0.90       |
| <b>Canopy vigor, biomass (GA and GGA from RGB)</b> | NDVI              | 0.43±0.03       | 0.39±0.05        |
|                                                    | GA                | 0.44±0.03       | 0.42±0.04        |
|                                                    | GGA               | 0.21±0.03       | 0.23±0.04        |
|                                                    | NGRDI             | -0.86±0.57      | -0.33±0.58       |
|                                                    | TGI               | 7106.46±1140.63 | 5494.99±1140.60  |
|                                                    | CSI               | 54.75±5.98      | 45.43±5.97       |
| <b>Water stress and root health</b>                | Porometer         | 108.15±10.76    | 97.05±10.77      |
|                                                    | Temperature       | 25.48±0.63      | 24.88±0.64       |
|                                                    | δ <sup>13</sup> C | -14.08±3.35     | -13.71±3.25      |
|                                                    | Percent C         | 20.43±2.26      | 21.80±2.19       |
|                                                    | δ <sup>15</sup> N | 4.13±0.67       | 3.92±0.66        |
|                                                    | Percent N         | 1.06±0.15       | 1.27±0.14        |

SPAD (Soil Plant Analysis Development), Chl (chlorophyll), Flav (flavonoid), Anth (anthocyanin), NBI (Nitrogen Balance Index), GA (Green area), GGA (Greener Green Area), TGI (Triangular Greenness Index), NGRDI (Normalized Green Red Difference Index), CSI (Crop Senescence Index), δ<sup>13</sup>C (isotopic composition of carbon 13), percent C (percentage of carbon), δ<sup>15</sup>N (isotopic composition of nitrogen 15), percent N (percentage of nitrogen).

**Table S4.** Mean and standard error of two treatments (grafted, non-grafted) of separate years (2016, 2017) n=20+16 of melon crops grown in a greenhouse in soil infected by root knot nematode of three classes of parameters (leaf level pigments, canopy vigor and biomass, water stress and root health).

|                                                                         | Parameters        | Mean grafted<br>2016 | Mean non-<br>grafted 2016 | Mean grafted<br>2017 | Mean non-<br>grafted<br>2017 |
|-------------------------------------------------------------------------|-------------------|----------------------|---------------------------|----------------------|------------------------------|
| <b>Leaf level<br/>pigments ( SPAD,<br/>Dualox)</b>                      | SPAD              | 40.33±2.02           | 44.18±2.00                | 38.28±1.34           | 33.48±1.32                   |
|                                                                         | Chl               | 35.14±1.53           | 35.87±1.52                | 26.37±2.72           | 34.25±2.74                   |
|                                                                         | Flav              | 1.91±0.04            | 1.97±0.03                 | 1.37±0.16            | 1.98±0.18                    |
|                                                                         | Anth              | 0.16±0.03            | 0.18±0.01                 | 0.17±0.01            | 0.19±0.01                    |
|                                                                         | NBI               | 18.56±1.05           | 18.31±1.03                | 21.02±1.59           | 17.46±1.57                   |
| <b>Canopy<br/>vigor,<br/>biomass<br/>(GA and<br/>GGA up to<br/>RGB)</b> | NDVI              | 0.52±0.03            | 0.46±0.05                 | 0.31±0.23            | 0.31±0.22                    |
|                                                                         | GA                | 0.46±0.04            | 0.40±0.32                 | 0.41±0.08            | 0.44±0.07                    |
|                                                                         | GGA               | 0.28±0.06            | 0.32±0.04                 | 0.12±0.03            | 0.12±0.03                    |
|                                                                         | NGRDI             | -0.02±0.01           | 0.00±0.03                 | -1.92±1.29           | -0.73±1.28                   |
|                                                                         | TGI               | 2728.13±181.57       | 1575.86±181.55            | 12579.40±345.26      | 10393.90±345.25              |
|                                                                         | CSI               | 40.45±4.54           | 21.68±4.57                | 72.61±2.73           | 75.13±2.71                   |
| <b>Water<br/>stress and<br/>root health</b>                             | Porometer         | 119.89±17.25         | 95.24±17.23               | 93.49±11.36          | 99.33±11.34                  |
|                                                                         | Temperature       | 23.68±0.44           | 22.69±0.43                | 27.73±0.58           | 27.61±0.59                   |
|                                                                         | δ <sup>13</sup> C | -1.75±0.15           | -1.97±0.14                | -29.08±0.46          | -28.38±0.45                  |
|                                                                         | Percent C         | 23.81±3.25           | 23.72±3.08                | 16.62±2.88           | 19.40±2.89                   |
|                                                                         | δ <sup>15</sup> N | 5.00±1.08            | 5.01±1.09                 | 3.04±0.41            | 2.55±0.40                    |
|                                                                         | Percent N         | 1.12±0.22            | 1.55±0.22                 | 0.97±0.14            | 0.93±0.15                    |

SPAD (Soil Plant Analysis Development), Chl (chlorophyll), Flav (flavonoid), Anth ( anthocyanin), NBI (Nitrogen Balance Index), GA (Green area), GGA (Greener Green Area), TGI (Triangular Greenness Index), NGRDI (Normalized Green Red Difference Index), CSI (Crop Senescence Index), δ<sup>13</sup>C (isotopic composition of carbon 13), percent C (percentage of carbon), δ<sup>15</sup>N (isotopic composition of nitrogen 15), percent N (percentage of nitrogen).

**Table S5.** ANOVA of tomato crop of two years combined (2017, 2020) n=16+20, and melon separate years of three classes of parameters (leaf level pigments, canopy vigor and biomass, water stress and root health).

|                                                     | Parameters            | P Value<br>Treatments<br>combined | P Value<br>Treatments<br>2017 | P Value<br>Treatments<br>2020 |
|-----------------------------------------------------|-----------------------|-----------------------------------|-------------------------------|-------------------------------|
| <b>Leaf level pigments (SPAD, Dualex)</b>           | SPAD                  | 0.120                             | 0.053                         | 0.092                         |
|                                                     | Chl                   | 0.046                             | 0.242                         | 0.086                         |
|                                                     | Flav                  | 0.976                             | 0.813                         | 0.868                         |
|                                                     | Anth                  | 0.717                             | 0.467                         | 0.660                         |
|                                                     | NBI                   | 0.218                             | 0.512                         | 0.215                         |
| <b>Canopy vigor, biomass (GA and GGA up to RGB)</b> | NDVI                  | 0.057                             | 0.580                         | 0.001                         |
|                                                     | GA                    | 0.333                             | 0.077                         | 0.001                         |
|                                                     | GGA                   | 0.753                             | 0.564                         | 0.882                         |
|                                                     | NGRDI                 | 0.469                             | 0.203                         | 0.006                         |
|                                                     | TGI                   | 0.768                             | 0.648                         | 0.017                         |
|                                                     | CSI                   | 0.014                             | 0.081                         | 0.029                         |
| <b>Water stress and root health</b>                 | Porometer             | 0.426                             | 0.055                         | 0.321                         |
|                                                     | Temperature           | 0.635                             | 0.249                         | 0.247                         |
|                                                     | $\delta^{13}\text{C}$ | 0.960                             | 0.537                         | 0.222                         |
|                                                     | Percent C             | 0.932                             | 0.980                         | 0.215                         |
|                                                     | $\delta^{15}\text{N}$ | 0.016                             | 0.326                         | 0.000                         |
|                                                     | Percent N             | 0.675                             | 0.763                         | 0.153                         |

SPAD (Soil Plant Analysis Development), Chl (chlorophyll), Flav (flavonoid), Anth (anthocyanin), NBI (Nitrogen Balance Index), GA (Green area), GGA (Greener Green Area), TGI (Triangular Greenness Index), NGRDI (Normalized Green Red Difference Index), CSI (Crop Senescence Index),  $\delta^{13}\text{C}$  (isotopic composition of carbon 13), percent C (percentage of carbon),  $\delta^{15}\text{N}$  (isotopic composition of nitrogen 15), percent N (percentage of nitrogen).

**Table S6.** Mean and standard error of two treatments (grafted, non-grafted) of separate years (2017, 2020) n=17+20 of tomato crop grown in a greenhouse in soil infected by root knot nematode of three classes of parameters (leaf level pigments, canopy vigor and biomass, after stress and root health).

|                                                             | Parameters        | Mean<br>grafted<br>2017 | Mean<br>non-grafted<br>2017 | Mean,<br>grafted<br>2020 | Mean<br>non-grafted<br>2020 |
|-------------------------------------------------------------|-------------------|-------------------------|-----------------------------|--------------------------|-----------------------------|
| <b>Leaf level pigments<br/>(SPAD move to<br/>Duallex)</b>   | SPAD              | 59.31±2.74              | 51.13±2.73                  | 41.19±0.71               | 39.47±0.72                  |
|                                                             | Chl               | 21.61±18.62             | 24.01±1.39                  | 24.12±0.52               | 25.39±0.51                  |
|                                                             | Flav              | 0.75±0.04               | 0.76±0.03                   | 0.67±0.01                | 0.66±0.01                   |
|                                                             | Anth              | 0.15±0.02               | 0.13±0.01                   | 0.02±0.01                | 0.01±0.02                   |
|                                                             | NBI               | 30.67±2.07              | 32.64±2.09                  | 37.18±1.10               | 39.16±1.12                  |
| <b>Canopy vigor, biomass<br/>(GA and GGA up to<br/>RGB)</b> | NDVI              | 0.64±0.03               | 0.61±0.04                   | 0.36±0.03                | 0.24±0.02                   |
|                                                             | GA                | 0.59±0.04               | 0.69±0.03                   | 0.32±0.03                | 0.21±0.02                   |
|                                                             | GGA               | 0.46±0.04               | 0.49±0.05                   | 0.49±0.06                | 0.50±0.05                   |
|                                                             | NGRDI             | 4.10±1.10               | 6.18±1.10                   | 0.00±0.01                | -0.04±0.01                  |
|                                                             | TGI               | 11405.90±329.<br>14     | 11189.10±329.1<br>2         | 2017.40±113.<br>93       | 1615.59±113.<br>90          |
|                                                             | CSI               | 21.19±2.82              | 28.64±2.80                  | 11.65±1.77               | 17.28±1.75                  |
| <b>Water stress and root<br/>health</b>                     | Porometer         | 91.58±11.94             | 126.83±11.92                | 131.83±4.27              | 125.79±4.25                 |
|                                                             | Temperature       | 25.38±0.28              | 24.91±0.27                  | 23.85±0.23               | 24.23±0.24                  |
|                                                             | δ <sup>13</sup> C | -30.23±0.46             | -29.83±0.45                 | -30.71±0.12              | -30.88±0.10                 |
|                                                             | Percent C         | 21.37±2.18              | 21.45±2.19                  | 43.16±0.21               | 42.79±0.20                  |
|                                                             | δ <sup>15</sup> N | 6.28±0.50               | 5.56±0.52                   | 4.55±0.15                | 3.67±0.15                   |
|                                                             | Percent N         | 1.74±0.19               | 1.66±0.18                   | 4.02±0.08                | 3.88±0.07                   |

SPAD (Soil Plant Analysis Development), Chl (chlorophyll), Flav (flavonoid), Anth ( anthocyanin), NBI (Nitrogen Balance Index), GA (Green area), GGA (Greener Green Area), TGI (Triangular Greenness Index), NGRDI (Normalized Green Red Difference Index), CSI (Crop Senescence Index), δ<sup>13</sup>C (isotopic composition of carbon 13), percent C (percentage of carbon), δ<sup>15</sup>N (isotopic composition of nitrogen 15), percent N (percentage of nitrogen).

**Table S7.** Mean and standard error of two treatments (grafted, non-grafted) of combined two years (2017 and 2020), with n=16+40 of tomato crop grown in a greenhouse in soil infected by root knot nematode of three classes of parameters (leaf level pigments, canopy vigor and biomass, water stress and root health).

|                                                     | Parameters        | Mean grafted   | Mean non-grafted |
|-----------------------------------------------------|-------------------|----------------|------------------|
| <b>Leaf level pigments (SPAD, Dualex)</b>           | SPAD              | 46.37 ±1.60    | 42.80±1.62       |
|                                                     | Chl               | 23.40±0.56     | 25.00±0.55       |
|                                                     | Flav              | 0.69±0.01      | 0.69±0.01        |
|                                                     | Anth              | 0.05±0.01      | 0.05±0.02        |
|                                                     | NBI               | 35.32±1.14     | 37.29±1.12       |
| <b>Canopy vigor, biomass (GA and GGA up to RGB)</b> | NDVI              | 0.44±0.03      | 0.35±0.05        |
|                                                     | GA                | 0.40±0.05      | 0.34±0.04        |
|                                                     | GGA               | 0.49±0.04      | 0.50±0.03        |
|                                                     | NGRDI             | 1.17±0.56      | 1.74±0.55        |
|                                                     | TGI               | 4699.83±833.09 | 4350.86±833.08   |
|                                                     | CSI               | 14.37±1.72     | 20.52±1.72       |
| <b>Water stress and root health</b>                 | Porometer         | 120.33±5.08    | 126.08±5.07      |
|                                                     | Temperature       | 24.29±0.23     | 24.43±0.21       |
|                                                     | δ <sup>13</sup> C | -30.57±0.16    | -30.58±0.17      |
|                                                     | Percent C         | 36.93±1.97     | 36.69±1.98       |
|                                                     | δ <sup>15</sup> N | 5.04±0.24      | 4.21±0.23        |
|                                                     | Percent N         | 3.37±0.21      | 3.25±0.20        |

SPAD (Soil Plant Analysis Development), Chl (chlorophyll), Flav (flavonoid), Anth ( anthocyanin), NBI (Nitrogen Balance Index), GA (Green area), GGA (Greener Green Area), TGI (Triangular Greenness Index), NGRDI (Normalized Green Red Difference Index), CSI (Crop Senescence Index), δ<sup>13</sup>C (isotopic composition of carbon 13), percent C (percentage of carbon), δ<sup>15</sup>N (isotopic composition of nitrogen 15), percent N (percentage of nitrogen).

**Table S8.** ANOVA of eggplant crop of 2018 with n=20 of three classes of parameters (leaf level pigments, canopy vigor and biomass, water stress and root health).

|                                                     | Parameters            | P Value Treatments |
|-----------------------------------------------------|-----------------------|--------------------|
| <b>Leaf level pigments (SPAD, Dualex)</b>           | SPAD                  | 0.127              |
|                                                     | Chl                   | 0.398              |
|                                                     | Flav                  | 0.040              |
|                                                     | Anth                  | 0.251              |
|                                                     | NBI                   | 0.041              |
| <b>Canopy vigor, biomass (GA and GGA up to RGB)</b> | NDVI                  | 0.572              |
|                                                     | GA                    | 0.973              |
|                                                     | GGA                   | 0.369              |
|                                                     | NGRDI                 | 0.914              |
|                                                     | TGI                   | 0.279              |
|                                                     | CSI                   | 0.017              |
| <b>Water stress and root health</b>                 | Temperature           | 0.337              |
|                                                     | $\delta^{13}\text{C}$ | 0.175              |
|                                                     | Percent C             | 0.672              |
|                                                     | $\delta^{15}\text{N}$ | 0.223              |
|                                                     | Percent N             | 0.022              |

SPAD (Soil Plant Analysis Development), Chl (chlorophyll), Flav (flavonoid), Anth ( anthocyanin), NBI (Nitrogen Balance Index), GA (Green area), GGA (Greener Green Area), TGI (Triangular Greenness Index), NGRDI (Normalized Green Red Difference Index), CSI (Crop Senescence Index),  $\delta^{13}\text{C}$  (isotopic composition of carbon 13), percent C (percentage of carbon),  $\delta^{15}\text{N}$  (isotopic composition of nitrogen 15), percent N (percentage of nitrogen).

**Table S9.** Mean and standard error of two treatments (grafted, non-grafted) of 2018 with n=20 of eggplant crop grown in a greenhouse in soil infected by root knot nematode.

|                                                     | Parameters        | Mean grafted   | Mean non- grafted |
|-----------------------------------------------------|-------------------|----------------|-------------------|
| <b>Leaf level pigments (SPAD, Dualex)</b>           | SPAD              | 42.39±1.99     | 37.92±1.98        |
|                                                     | Chl               | 24.42±0.64     | 23.66±0.62        |
|                                                     | Flav              | 0.62±0.01      | 0.67±0.02         |
|                                                     | Anth              | 0.01±0.01      | 0.02±0.03         |
|                                                     | NBI               | 40.10±1.28     | 36.07±1.29        |
| <b>Canopy vigor, biomass (GA and GGA up to RGB)</b> | NDVI              | 0.63±0.06      | 0.66±0.04         |
|                                                     | GA                | 0.68±0.05      | 0.68±0.06         |
|                                                     | GGA               | 0.44±0.06      | 0.53±0.07         |
|                                                     | NGRDI             | 0.04±0.02      | 0.05±0.03         |
|                                                     | TGI               | 3833.18±293.60 | 3369.63±293.63    |
|                                                     | CSI               | 40.10±4.56     | 23.15±4.55        |
| <b>Water stress and root health</b>                 | Temperature       | 25.87±0.47     | 25.19±0.49        |
|                                                     | δ <sup>13</sup> C | -30.41±0.23    | -29.97±0.21       |
|                                                     | Percent C         | 38.20±0.88     | 37.68±0.84        |
|                                                     | δ <sup>15</sup> N | 6.55±0.58      | 5.54±0.55         |
|                                                     | Percent N         | 3.21±0.15      | 2.70±0.14         |

SPAD (Soil Plant Analysis Development), Chl (chlorophyll), Flav (flavonoid), Anth ( anthocyanin), NBI (Nitrogen Balance Index), GA (Green area), GGA (Greener Green Area), TGI (Triangular Greenness Index), NGRDI (Normalized Green Red Difference Index), CSI (Crop Senescence Index), δ<sup>13</sup>C (isotopic composition of carbon 13), percent C (percentage of carbon), δ<sup>15</sup>N (isotopic composition of nitrogen 15), percent N (percentage of nitrogen).

**Table S10.** ANOVA of Pepper crop of 2019 with n=40 of three classes of parameters (leaf level pigments, canopy vigor and biomass, water stress and root health).

|                                                           | Parameters            | P value Treatments |
|-----------------------------------------------------------|-----------------------|--------------------|
| <b>Leaf level pigments (SPAD, Dualex)</b>                 | SPAD                  | 0.881              |
|                                                           | Chl                   | 0.437              |
|                                                           | Flav                  | 0.017              |
|                                                           | Anth                  | 0.468              |
|                                                           | NBI                   | 0.076              |
| <b>Canopy vigor. biomass (GA and GGA and on from RGB)</b> | NDVI                  | 0.000              |
|                                                           | GA                    | 0.001              |
|                                                           | GGA                   | 0.000              |
|                                                           | NGRDI                 | 0.000              |
|                                                           | TGI                   | 0.204              |
|                                                           | CSI                   | 0.000              |
| <b>Water stress and root health</b>                       | Temperature           | 0.110              |
|                                                           | $\delta^{13}\text{C}$ | 0.106              |
|                                                           | Percent C             | 0.051              |
|                                                           | $\delta^{15}\text{N}$ | 0.024              |
|                                                           | Percent N             | 0.004              |

SPAD (Soil Plant Analysis Development), Chl (chlorophyll), Flav (flavonoid), Anth (anthocyanin), NBI (Nitrogen Balance Index), GA (Green area), GGA (Greener Green Area), TGI (Triangular Greenness Index), NGRDI (Normalized Green Red Difference Index), CSI (Crop Senescence Index),  $\delta^{13}\text{C}$  (isotopic composition of carbon 13), percent C (percentage of carbon),  $\delta^{15}\text{N}$  (isotopic composition of nitrogen 15), percent N (percentage of nitrogen).

**Table S11.** Mean and standard error of two treatments (grafted, non-grafted) of 2019 with n=40 of pepper crop grown in a greenhouse in soil infected by root knot nematode of three classes of parameters (leaf level pigments, canopy vigor and biomass, water stress and root health).

|                                                             | Parameters        | Mean grafted | Mean non- grafted |
|-------------------------------------------------------------|-------------------|--------------|-------------------|
| <b>Leaf level pigments<br/>(SPAD, Dualex)</b>               | SPAD              | 54.91±1.15   | 55.15±1.14        |
|                                                             | Chl               | 25.05±0.53   | 24.47±0.54        |
|                                                             | Flav              | 0.64±0.03    | 0.68±0.01         |
|                                                             | Anth              | 0.02±0.02    | 0.01±0.01         |
|                                                             | NBI               | 39.56±1.07   | 36.78±1.08        |
| <b>Canopy vigor, biomass<br/>(GA and GGA up to<br/>RGB)</b> | NDVI              | 0.33±0.04    | 0.46±0.02         |
|                                                             | GA                | 0.05±0.02    | 0.09±0.01         |
|                                                             | GGA               | 0.04±0.02    | 0.08±0.01         |
|                                                             | NGRDI             | -0.12±0.01   | -0.15±0.03        |
|                                                             | TGI               | 941.18±48.55 | 849.98±51.17      |
|                                                             | CSI               | 27.39±2.44   | 11.18±2.41        |
| <b>Water stress and root<br/>health</b>                     | Temperature       | 26.86±0.18   | 26.48±0.17        |
|                                                             | δ <sup>13</sup> C | -29.45±0.11  | -29.70±0.13       |
|                                                             | Percent C         | 25.86±0.56   | 27.41±0.54        |
|                                                             | δ <sup>15</sup> N | 6.70±0.26    | 7.53±0.25         |
|                                                             | Percent N         | 1.82±0.06    | 2.10±0.07         |

SPAD (Soil Plant Analysis Development), Chl (chlorophyll), Flav (flavonoid), Anth ( anthocyanin), NBI (Nitrogen Balance Index), GA (Green area), GGA (Greener Green Area), TGI (Triangular Greenness Index), NGRDI (Normalized Green Red Difference Index), CSI (Crop Senescence Index), δ<sup>13</sup>C (isotopic composition of carbon 13), percent C (percentage of carbon), δ<sup>15</sup>N (isotopic composition of nitrogen 15), percent N (percentage of nitrogen).
